1 ***Escherichia coli* ZipA organizes FtsZ polymers into dynamic ring-like**  
2 **protofilament structures**

3

4 Marcin Krupka<sup>1\*</sup>, Marta Sobrinos-Sanguino<sup>2\*</sup>, Mercedes Jiménez<sup>2</sup>, Germán Rivas<sup>2</sup>, and  
5 William Margolin<sup>1</sup>

6

7 <sup>1</sup>Department of Microbiology and Molecular Genetics, McGovern Medical School, 6431  
8 Fannin St., Houston TX, 77030, USA.

9

10 <sup>2</sup>Centro de Investigaciones Biológicas, Consejo Superior de Investigaciones Científicas  
11 (CSIC), C/ Ramiro de Maetzu 9, 28040, Madrid, Spain.

12

13

14 (\*) These authors contributed equally

15

16 Corresponding Authors:

17 William Margolin

18 Mercedes Jiménez

19 Germán Rivas

20

21

22

23

24

1 **ABSTRACT**

2 ZipA is an essential cell division protein in *Escherichia coli*. Together with FtsA, ZipA  
3 tethers dynamic polymers of FtsZ to the cytoplasmic membrane, and these polymers are  
4 required to guide synthesis of the cell division septum. This dynamic behavior of FtsZ has  
5 been reconstituted on planar lipid surfaces *in vitro*, visible as GTP-dependent chiral vortices  
6 several hundred nm in diameter, when anchored by FtsA or when fused to an artificial  
7 membrane binding domain. However, these dynamics largely vanish when ZipA is used to  
8 tether FtsZ polymers to lipids at high surface densities. This, along with some *in vitro* studies  
9 in solution, has led to the prevailing notion that ZipA reduces FtsZ dynamics by enhancing  
10 bundling of FtsZ filaments. Here, we show that this is not the case. When lower, more  
11 physiological levels of the soluble, cytoplasmic domain of ZipA (sZipA) were attached to  
12 lipids, FtsZ assembled into highly dynamic vortices similar to those assembled with FtsA or  
13 other membrane anchors. Notably, at either high or low surface densities, ZipA did not  
14 stimulate lateral interactions between FtsZ protofilaments. We also used *E. coli* mutants that  
15 are either deficient or proficient in FtsZ bundling to provide evidence that ZipA does not  
16 directly promote bundling of FtsZ filaments *in vivo*. Together, our results suggest that ZipA  
17 does not dampen FtsZ dynamics as previously thought, and instead may act as a passive  
18 membrane attachment for FtsZ filaments as they treadmill.

19

20

1 **IMPORTANCE**

2 Bacterial cells use a membrane-attached ring of proteins to mark and guide formation of a  
3 division septum at mid-cell that forms a wall separating the two daughter cells and allows  
4 cells to divide. The key protein in this ring is FtsZ, a homolog of tubulin that forms dynamic  
5 polymers. Here, we use electron microscopy and confocal fluorescence imaging to show that  
6 one of the proteins required to attach FtsZ polymers to the membrane during *E. coli* cell  
7 division, ZipA, can promote dynamic swirls of FtsZ on a lipid surface *in vitro*. Importantly,  
8 these swirls are only observed when ZipA is present at low, physiologically relevant surface  
9 densities. Although ZipA has been thought to enhance bundling of FtsZ polymers, we find  
10 little evidence for bundling *in vitro*. In addition, we present several lines of *in vivo* evidence  
11 indicating that ZipA does not act to directly bundle FtsZ polymers.

12

13

## 1 INTRODUCTION

2 Bacterial septation is a complex process and dozens of essential and accessory  
3 proteins participate to assemble the cell division machinery, the divisome. In *Escherichia coli*  
4 the earliest event in the septum formation is the assembly of FtsZ, FtsA and ZipA into the  
5 proto-ring, a discontinuous structure at mid-cell that serves as a scaffold for the rest of the  
6 divisome components (1, 2).

7 FtsZ, a prokaryotic tubulin homologue, assembles into GTP-dependent protofilaments  
8 required for divisome activity (3–7). These FtsZ filaments are anchored to the inner surface  
9 of the cytoplasmic membrane by both FtsA and ZipA, and migrate in patches around the cell  
10 circumference by treadmilling. Through connections involving other divisome proteins that  
11 cross the cytoplasmic membrane, these treadmilling FtsZ protofilaments help to guide the  
12 septum synthesis machinery in concentric circles, resulting in inward growth of the septal  
13 wall until it closes and the daughter cells are separated (8, 9).

14 Although FtsA is conserved throughout diverse bacterial species, ZipA is limited to  
15 gamma-proteobacteria, including *E. coli* (10). In the absence of both FtsA and ZipA, FtsZ  
16 fails to attach to the membrane or form the proto-ring, demonstrating the requirement for a  
17 membrane tether (11). In the presence of only FtsA or ZipA, FtsZ filaments form a  
18 membrane-anchored ring, but septation fails to proceed (12), suggesting that the divisome is  
19 in a locked state. One major unanswered question in the field is why *E. coli* requires dual  
20 FtsZ membrane anchors to assemble a divisome that completes septation. Our recent study  
21 provides a potential answer by showing that FtsA exerts a specific structural and functional  
22 constraint on FtsZ protofilaments: when attached to lipid monolayers, FtsA assembles into  
23 clusters of polymeric minirings that align FtsZ polymers and inhibit their bundling (13).

24 In this report we use the term “bundling” in reference to increased lateral interactions  
25 between adjacent FtsZ protofilaments, resulting in two or more polymers closely associated

1 in parallel. The physiological role of these lateral interactions is not firmly established, but  
2 several FtsZ mutants that are defective in protofilament bundling *in vitro* are also defective in  
3 cell division (14–16). In addition to the intrinsic ability of FtsZ polymers to interact laterally,  
4 proteins called Zaps (ZapA, C, D; FtsZ-associated proteins) help to bundle or crosslink FtsZ  
5 polymers *in vitro* (17, 18). Inactivation of single Zap proteins is not lethal, but mutant cells  
6 lacking multiple Zap proteins have significant division defects (19–23). Hyper-bundled  
7 mutants of FtsZ have also been isolated, and cells expressing these alleles also divide  
8 abnormally (24–26). However, one hyper-bundling mutant, called FtsZ\*, has gain-of-  
9 function properties (27). FtsZ\*, which forms mostly double stranded filaments *in vitro*,  
10 allows division of cells lacking ZipA and can resist the effects of other FtsZ inhibitors.  
11 Together, these findings suggest that lateral interactions are important for FtsZ function, but  
12 these interactions need to be balanced.

13         The aforementioned study (13) proposed a model in which FtsA minirings antagonize  
14 FtsZ protofilament bundling, keeping the divisome in a locked state. In this model, once the  
15 cell is ready to divide, these minirings are disrupted and are no longer a constraint for FtsZ  
16 polymer bundling. This is consistent with another model in which broken FtsA polymers start  
17 to recruit later divisome components, while FtsZ polymers become anchored to cell  
18 membrane by ZipA (2, 28). ZipA has been shown to stabilize the proto-ring, not only by  
19 anchoring FtsZ to the membrane, but also by protecting it from degradation by ClpXP  
20 protease (29–31). Whereas FtsA inhibits FtsZ polymer bundling (13), ZipA is considered an  
21 FtsA competitor for FtsZ polymers because of their common binding site at the FtsZ C  
22 terminus (32–35). Thus, it is not surprising that ZipA has been suggested as a bundler of  
23 FtsZ. However, the reports on its effect on FtsZ protofilament bundling in solution are not  
24 consistent (27, 36–40).

1           Recently it has become clear that the functionalities of the proto-ring proteins need to  
2 be tested in a more physiological context by attaching them to a lipid surface (13, 41–47).  
3 For example, Mateos-Gil et al. (39) used atomic force microscopy to visualize FtsZ polymers  
4 bound to *E. coli* lipid bilayers through ZipA. These ZipA-tethered FtsZ molecules formed a  
5 dynamic two-dimensional network of curved, interconnected protofilaments that seemed to  
6 be bundled. On the contrary, ZipA incorporated into phospholipid bilayer nanodiscs did not  
7 trigger significant FtsZ polymer bundling (29). Finally, Loose and Mitchison (44)  
8 reconstituted the *E. coli* proto-ring components on supported lipid bilayers and showed that  
9 FtsA organized FtsZ polymers into dynamic patterns of coordinated streams and swirling  
10 rings with preferential directions, which suggested treadmilling. Importantly, these dynamics  
11 were sharply reduced when FtsZ protofilaments were attached to the membrane by ZipA or  
12 when using artificially membrane-targeted FtsZ. Although the resulting FtsZ polymers were  
13 described as bundled, the resolution obtained by TIRFM probably could not distinguish  
14 between single and bundled FtsZ protofilaments. More recently, it was found that artificially  
15 membrane-bound FtsZ self-organizes into similar vortices, even in the absence of FtsA (45).  
16 This effect casts doubt on the dampening effects of ZipA on FtsZ dynamics observed  
17 previously.

18           In this study, we revisit the effect of ZipA on FtsZ protofilaments, including its role in  
19 polymer bundling. In contrast to the prevailing model, our *in vivo* results show that unlike  
20 Zaps, FtsZ\* or the FtsA\* gain of function mutant (48), ZipA does not play a significant role  
21 in FtsZ protofilament bundling. We further show that as previously reported (46, 49)  
22 (Sobrinós-Sanguino et al., in preparation), the surface concentration of ZipA is critical in  
23 controlling the activities and interactions with FtsZ *in vitro*. Using a His<sub>6</sub>-tagged soluble  
24 variant of ZipA (sZipA) immobilized on lipids, we demonstrate that this protein organizes  
25 FtsZ into similar swirling vortices of mostly single protofilaments, a role that was previously

1 attributed exclusively to FtsA (44). These results provide further evidence that ZipA does not  
2 inhibit FtsZ polymer dynamics at the membrane.

3

## 4 **RESULTS**

5

### 6 **FtsA\* or excess FtsZ rescue the FtsZ bundling deficient $\Delta zapA\Delta zapC$ mutant**

7       Recently we reported that FtsZ protofilament bundling is antagonized by FtsA, both  
8 *in vivo* and *in vitro* (13). For example, FtsA overproduction reverses the toxic effects of FtsZ  
9 over-bundling triggered by excess ZapA. Conversely, even a slight excess of FtsA  
10 exacerbates the already moderately filamentous cell phenotype of  $\Delta zapA$  or the more severe  
11 filamentous phenotype of  $\Delta zapA\Delta zapC$  double mutants (13), which lack one or two FtsZ  
12 bundling proteins, respectively (18). We also previously reported that the self-bundling  
13 mutant *ftsZ\** (encoding FtsZ<sub>L169R</sub>) could completely suppress the cell division deficiency of  
14 the  $\Delta zapA\Delta zapC$  double mutant (27). This suggested that if FtsZ protofilaments are bundled  
15 by factors independent of ZapA and ZapC, then the requirement for the latter proteins in  
16 normal cell division could be bypassed.

17       We first surmised that a moderate increase in intracellular FtsZ concentration could  
18 promote polymer bundling simply by molecular crowding, and this could bypass the need for  
19 ZapA and ZapC and consequently suppress the filamentation of many  $\Delta zapA\Delta zapC$  cells  
20 (Fig. 1A-B). To produce extra FtsZ, we used the pJF119HE-FtsZ plasmid (26). As expected,  
21 FtsZ overproduction suppressed  $\Delta zapA\Delta zapC$  cell filamentation (Fig. 1C), supporting the  
22 idea that higher FtsZ protein concentration favors increased lateral interactions between  
23 protofilaments.

24       We then asked whether FtsA\*, a potent gain-of-function mutant that repairs multiple  
25 cell division defects (48, 50–53), could bypass the need for ZapA and ZapC. Unlike wild-

1 type FtsA, FtsA\* promotes FtsZ polymer bundling on lipid monolayers (13). We found that  
2 even uninduced levels of FtsA\* from pDSW210F-FtsA\* were sufficient to completely rescue  
3 the division defects of  $\Delta zapA\Delta zapC$  cells (Fig. 1D). Therefore, FtsA\* has the same rescuing  
4 effect as FtsZ\* in the absence of ZapA and ZapC, supporting the idea that FtsA\*, ZapA and  
5 ZapC all promote FtsZ protofilament bundling like FtsZ\*.

6

### 7 **Excess ZipA cannot counteract cell division defects caused by deficient FtsZ bundling**

8 As already mentioned, *E. coli* FtsA inhibits FtsZ polymer bundling. Our *in vitro*  
9 results indicate that this occurs due to the unusual mini-ring polymers that purified FtsA  
10 forms on lipid monolayers. In contrast, purified FtsA\* forms shorter curved oligomers under  
11 similar conditions. Although the mechanism is not yet known, these FtsA\* arcs no longer  
12 inhibit FtsZ polymer bundling and instead permit or promote it, consistent with our *in vivo*  
13 results (Fig. 1D). This was most apparent when FtsA\* was combined with FtsZ\* on lipid  
14 monolayers: in a striking additive effect, large sheets were formed consisting of many  
15 laterally associated protofilaments (13). Interestingly, both gain of function mutants that  
16 promote FtsZ bundling, FtsA\* and FtsZ\*, bypass the need of the third proto-ring component,  
17 ZipA (27, 48). This, along with evidence that purified ZipA can bundle FtsZ under certain  
18 conditions, led to the hypothesis that ZipA might also trigger FtsZ bundling (54).

19 In this scenario, excess ZipA should be able to rescue the  $\Delta zapA\Delta zapC$  cell filamentation  
20 phenotype, similarly to excess FtsZ, FtsA\* or FtsZ\* (27) (Fig. 1). To test this, we first  
21 transformed the  $\Delta zapA\Delta zapC$  double deletion and its TB28 wild-type parental strain (55)  
22 with pKG110-ZipA, a plasmid that expresses *zipA* from a salicylate-inducible *nahG* promoter  
23 and a weak ribosome binding site that keeps expression low. Notably, uninduced levels of  
24 ZipA from pKG110-ZipA did not suppress the  $\Delta zapA\Delta zapC$  filamentous phenotype (Fig.  
25 2B). Instead, the induction of *zipA* expression was consistently more toxic not only for



1  $\Delta zapA\Delta zapC$ , but also for the  $\Delta zapA$  single deletion strain when compared with the wild-type  
2 parent TB28 (Fig. 2A). Endogenous FtsZ was produced at similar levels in both ZipA-  
3 uninduced and induced cells, ruling out the possibility that excess ZipA could affect viability  
4 through changes in FtsZ intracellular levels (Fig. S1A).

5 Further growth until late exponential phase exacerbated the already elongated cell  
6 phenotype of the  $\Delta zapA\Delta zapC$  strain both in the absence (Fig. 2C) and presence of inducer  
7 (Fig. 2D); cells of the  $\Delta zapA$  single mutant behaved similarly (not shown). These results  
8 suggest that ZipA might not be a bundler of FtsZ polymers, contrary to what we initially  
9 expected.

10 The region of ZipA known to interact with FtsZ polymers is the FZB (FtsZ Binding)  
11 globular domain at its C-terminal end (34, 37, 56, 57). To exclude the possibility that the  
12 toxicity of excess ZipA for  $\Delta zapA\Delta zapC$  cells was due to the accumulation of transmembrane  
13 domains at septation sites (49) or because the N-terminal transmembrane region of ZipA  
14 might affect cell division by an unknown mechanism, we separated the FZB domain from the  
15 transmembrane region. For this purpose we used a chimeric construct containing the C-  
16 terminal part of ZipA lacking the transmembrane region (ZipA<sub>23-328</sub>) fused to the N-terminal  
17 transmembrane domain of DjlA, (DjlA<sub>1-32</sub>), a protein not related to cell division (37). This  
18 hybrid membrane protein containing FZB was cloned into pKG116, a plasmid similar to  
19 pKG110 but with a stronger ribosome binding site for increased gene expression. However,  
20 similarly to the intact ZipA protein, the DjlA<sub>1-32</sub>-ZipA<sub>23-328</sub> (FZB) protein was toxic and  
21 exacerbated the phenotype of  $\Delta zapA\Delta zapC$  (Fig. 2E) and  $\Delta zapA$  (not shown) cells. This  
22 further suggests that binding of ZipA to FtsZ polymers does not promote their bundling, or at  
23 least the type of bundling that could compensate for the lack of ZapA and ZapC (18).  
24 To test the model further, we asked whether excess ZipA could rescue the dominant negative  
25 effects of an FtsZ allele (FtsZ<sub>R174D</sub>) that was reported to be defective in polymer bundling

1 (14). Although a subsequent study suggested that FtsZR174D was capable of bundling under  
2 certain conditions (58), we recently confirmed (Schoenemann et al., in revision) that this  
3 protein is indeed more bundling-defective than wild-type FtsZ, as suggested in the original  
4 report.

5 To test this idea, we constructed a strain with two plasmids: pDSW210F-ZipA-GFP,  
6 and either pKG110-FtsZ or pKG110-FtsZR174D, such that expression of ZipA-GFP is  
7 controlled by IPTG and expression of the FtsZ derivatives is controlled by sodium salicylate.  
8 The ZipA-GFP is functional and can complement a *zipA1(ts)* mutant (59). Expression of  
9 FtsZR174D at any level above 1  $\mu$ M sodium salicylate was strongly dominant negative (Fig.  
10 S2), in contrast to FtsZ, which allowed viability even at 2.5  $\mu$ M (and higher, not shown).  
11 Notably, ZipA, whether uninduced or induced with IPTG, was unable to counteract the  
12 dominant negative effects of FtsZR174D, consistent with the idea that ZipA does not promote  
13 FtsZ bundling (Fig. S2). This is in sharp contrast with hyper-bundled FtsZ\*, which is able to  
14 suppress the dominant negative effects of FtsZR174D (Schoenemann et al., in revision).  
15 Interestingly, the toxicity of ZipA at IPTG concentrations above 50  $\mu$ M was antagonized by  
16 extra FtsZ. One possible explanation is that increased FtsZ bundling triggered by its higher  
17 intracellular levels (Fig. 1C) counteracts the negative effects of excess ZipA (Fig. S2).

18

### 19 **FtsA\* and FtsZ\* confer at least 10-fold resistance to excess ZipA**

20 In our recent studies, we demonstrated that FtsZ\* has an intrinsic capacity to bundle  
21 compared with wild-type FtsZ (27), whereas FtsA\* can promote bundling of wild-type FtsZ  
22 protofilaments (13). Moreover, both gain of function mutants correct the defective division  
23 phenotype of  $\Delta zapA\Delta zapC$  under-bundling mutants (Fig. 1). If ZipA acts to bundle FtsZ  
24 polymers, its excess in an *ftsZ\** or *ftsA\** background should result in over-bundling and be  
25 toxic for the cells by inhibiting cell division, as previously reported (Haeusser et al., 2015).

1 To test this idea, we transformed WM1659 and WM4915, which replace the native  
2 chromosomal *ftsA* or *ftsZ* with *ftsA\** or *ftsZ\** alleles, respectively, with pKG110-*ZipA* in the  
3 WM1074 (MG1655) strain background. We found that *ZipA* overproduction from the *nahG*  
4 promoter was toxic at 5  $\mu$ M sodium salicylate in the wild-type parent strain, and became  
5 more toxic at 10  $\mu$ M inducer (Fig. 3, row 1). In contrast, the presence of *ftsA\** in WM1659  
6 conferred full resistance against excess *ZipA* (Fig. 3, row 3), consistent with the original  
7 report (48). The effects of *ftsZ\** in WM4915 were more modest, but nonetheless resulted in at  
8 least a 10-fold increase in resistance at 5  $\mu$ M inducer (Fig. 3, row 2). The effects of *ftsA\**,  
9 *ftsZ\** or *ZipA* levels on viability were not due to changes in *FtsZ* levels, as these remained  
10 unchanged in the various conditions (Fig. S1B). The ability of alleles that promote *FtsZ*  
11 protofilament bundling to antagonize *ZipA* toxicity instead of exacerbate it is yet another  
12 argument against the idea that *ZipA* is a bundler of *FtsZ*.

13

#### 14 **Excess ZapA and ZapC only partially suppress the thermosensitivity of *zipA1(ts)***

15 We further explored whether *ZipA* has any functional overlap with *Zap* proteins by  
16 testing if their overproduction could rescue a thermosensitive *zipA1(ts)* mutant (12). We  
17 introduced plasmids expressing *ftsZ\** (positive control), *zapA*, *zapC*, *zapD*, or a combination  
18 of *zapA* + *zapC*, *zapA* + *zapD*, or *zapC* + *zapD* genes into the *zipA1(ts)* strain WM5337. As  
19 expected, *FtsZ\**, *ZapA*, *ZapC*, or *ZapD* all became toxic when overproduced (Fig. 4A), and  
20 only *ftsZ\** could fully suppress *zipA1(ts)* at 42°C (27) (Fig. 4C). This suggests that the *FtsZ*  
21 bundling promoted by *Zaps* cannot substitute for the absence of functional *ZipA*.

22 The *zipA1(ts)* strain is also inviable at 37°C, and some factors can suppress the  
23 thermosensitivity of *zipA1* at these lower temperatures, including inactivation of certain  
24 amino acid biosynthesis genes (59). This suggests that the *ZipA1* protein is partially active at  
25 37°C, although not sufficient to sustain viability. To give the *Zap* proteins the best chance of

1 suppressing *zipAI*, we tested whether the Zap proteins might be able to partially compensate  
2 for a partially defective ZipA at this less stringent temperature. We found that neither ZapD  
3 nor ZapA were able to suppress *zipAI* thermosensitivity at 37°C, but ZapC was (Fig. 4B).  
4 We also noticed a weak synergistic effect upon coexpression of both ZapA and ZapC, where  
5 there was a limited level of viability even at 42°C (Fig. 4C). Moreover, *zapA* + *zapC*, *zapA* +  
6 *zapD*, or *zapC* + *zapD* pairs also conferred partial suppression of *zipAI* thermosensitivity at  
7 37°C (Fig. 4B). These results indicate that the Zap proteins and ZipA may have weak  
8 overlapping roles in FtsZ protofilament bundling, perhaps by enhancing the stability of the  
9 proto-ring and its tethering to the membrane and to the nucleoid (60).

10

## 11 **Low surface density ZipA organizes FtsZ into circular protofilament structures on lipid** 12 **monolayers**

13 So far, our *in vivo* data presented here are not consistent with the previous data that  
14 suggested ZipA is a major enhancer of FtsZ protofilament bundling. This prompted us to test  
15 whether ZipA had any effect on FtsZ bundling in an *in vitro* membrane system. For this, we  
16 examined the properties of FtsZ polymers on lipid monolayers. To date, this assay has been  
17 mainly used to visualize oligomeric structures of FtsZ protofilaments along with their FtsA  
18 membrane tethers by electron microscopy (13, 35, 43, 61, 62). Whereas FtsA has a short C-  
19 terminal amphipathic helix that acts as a membrane anchor (11, 61, 63), ZipA has a short N-  
20 terminal periplasmic region followed by a transmembrane domain (36, 37, 64).

21 Consequently, full-length ZipA could not be used in our assay.

22 Therefore, we decided to use an N-terminally truncated ZipA (soluble ZipA, sZipA)  
23 replacing the first 25 amino acids with an N-terminal His<sub>6</sub> tag (65). To attach sZipA to the  
24 lipid monolayer, input lipids were supplemented with a nickel-chelating lipid (DGS-NTA)  
25 that anchors the His<sub>6</sub> tag, thus mimicking the membrane topology of the full-length protein

1 (44, 49, 65). The density of sZipA on the lipid monolayer surface was tuned by controlling  
2 the amount of NTA lipids added, as these two values are linearly proportional (Sobrinós-  
3 Sanguino, Ritcher and Rivas, in preparation). Importantly, we lowered the surface density of  
4 ZipA compared with previous studies (39, 44) by using 0.5-1% of NTA lipids instead of  
5 10%, which more closely mimic physiologically relevant levels of ZipA. 0.5% NTA  
6 corresponds to a surface density of  $\sim 2000$  ZipA molecules per  $\mu\text{m}^2$ . Unperturbed *E. coli* cells  
7 contain  $\sim 1500$  ZipA molecules per cell (66), which corresponds to around 400 molecules per  
8  $\mu\text{m}^2$  assuming a uniform distribution. If 30% of these ZipA molecules are in a midcell ring  
9 that comprises 5-10% of the cell length, the estimated protein concentration in the ring would  
10 be  $\sim 2000$  molecules per  $\mu\text{m}^2$ , which is the low surface density we used.

11 As expected, when FtsZ was added without sZipA and examined by negative stain  
12 transmission EM, FtsZ polymers were scattered sparsely on the lipid monolayer, consistent  
13 with the requirement for a membrane anchor such as FtsA or ZipA (1). This residual binding  
14 was likely a result of random association of the FtsZ from the added solution onto the grid  
15 (Fig. S3B). However, when FtsZ was added to monolayers coated with low-density sZipA,  
16 we observed extensive FtsZ protofilament patterns. Most notably, these patterns differed  
17 depending on the concentration of NTA lipids, which in turn dictated the concentration of  
18 ZipA on the monolayer. For example, when FtsZ (1-5  $\mu\text{M}$ ) was polymerized with non-  
19 hydrolyzable GTP (GMPcPP) on monolayers seeded with low-density ZipA (0.5% NTA  
20 lipids out of the total input lipids), it became strikingly organized into circular structures of  
21 mostly single protofilaments in a repetitive pattern (Fig. 5A). These circular structures had an  
22 average of nine filaments per polymer. The external diameter was  $279 \pm 50$  nm, with a  
23 lumen, lacking filaments, of  $\sim 100$  nm in diameter. The lateral separation between the  
24 filaments was  $10 \pm 4$  nm. The filaments that were closest together mostly appeared as double  
25 filaments, but were very loose and non-continuous (more than 70 structures were measured).

1           In the presence of GTP, which should support GTPase activity and filament  
2   treadmilling, the ring-like structures contained a smaller number of filaments ( $6 \pm 2$ ) but were  
3   larger than the structures formed in GMPcPP, with an external diameter of  $400 \pm 80$  nm and a  
4   lumen  $190 \pm 20$  nm in diameter. The GTP-FtsZ filaments appeared more separated than those  
5   formed with GMPcPP, as the average separation was  $20 \pm 9$  nm (more than 50 structures  
6   were measured) (Fig. 5B). For both GTP and GMPcPP ring-like structures, the spacing  
7   measurements were compatible with the FtsZ filament arrangement found in the presence of  
8   FtsA minirings (13). To assess the effect of different lipids on these structures, we made lipid  
9   monolayers with DOPC. Similar ring-like structures containing FtsZ were observed with  
10   GTP (Fig. S4).

11           Next, we asked whether increasing surface density of sZipA might affect the ring-like  
12   structures of FtsZ polymers. We saw no difference between monolayers containing 0.5% vs.  
13   1% NTA lipids (not shown). We then significantly increased the surface concentration of  
14   sZipA on monolayers by increasing the NTA concentration to 10%, mimicking ZipA  
15   overproduction *in vivo*. Whereas no oligomeric structures were detectable with sZipA alone  
16   (Fig. S3A), when FtsZ was added to the sZipA at this high surface density, polymers were  
17   strikingly aligned into parallel tracks of long, straight protofilaments spaced  $\sim 20$  nm apart,  
18   and the formation of ring-like swirls observed at lower ZipA densities was abolished. Even at  
19   this high density of ZipA, most of FtsZ protofilaments remained unbundled (Fig. 5C).  
20   Whether FtsZ formed straight alignments or swirls was independent of FtsZ concentrations  
21   added to the reactions within the 1.5-5  $\mu$ M physiological range (Fig. 5 and data not shown)  
22   (66).

23

24   **FtsZ swirls formed at low ZipA densities are highly dynamic and driven by GTP**  
25   **hydrolysis**

1           The ring-like structures formed by FtsZ polymers on low density sZipA resembled the  
2 dynamic vortices formed either by FtsZ bound to membrane-attached FtsA or FtsZ fused to  
3 YFP and a membrane targeting sequence (FtsZ-YFP-mts) on supported lipid bilayers (44,  
4 45). This prompted us to analyze the dynamics of fluorescently labeled FtsZ protofilaments  
5 on bilayers containing 0.5% NTA (low density sZipA) using confocal microscopy. When  
6 GTP was added to trigger FtsZ polymerization, we observed swirling vortices with a chiral  
7 clockwise rotation, similar to those from the aforementioned reports (Fig. 6A, Video S1). A  
8 consistently negative slope of the kymographs (Fig. S5) confirmed the directionality of the  
9 rotation within the rings. The estimated rotational speed within these structures was  $\sim 1.8 \mu\text{m}$   
10  $\text{min}^{-1}$ . Similar, but markedly less dynamic swirling rings were observed in the presence of  
11 GMPcPP (Fig. 6B, Video S2). The estimated speed was  $0.3 \mu\text{m} \text{min}^{-1}$ , consistent with the  
12 idea that vortex formation is driven by GTP hydrolysis (45).

13           To visualize the structure of these vortices in more detail, we used super-resolution  
14 microscopy (STED). These structures were sharper than those imaged by standard confocal  
15 microscopy and their size was similar to the size of the lipid monolayer-attached swirls  
16 observed previously by electron microscopy (Fig. 6C). We also used total internal reflection  
17 fluorescence microscopy (TIRFM) to visualize the FtsZ swirls at low ZipA surface density.  
18 We confirmed that these swirls formed both in GTP and GMPcPP (data not shown).  
19 However, the TIRFM approach, which is highly sensitive to the distance of the fluorophore  
20 from the surface, was hampered by significant image fluctuation, most probably due to the  
21 movement of the unstructured domain of ZipA. This precluded a more precise analysis of the  
22 FtsZ swirls by TIRFM.

23  
24  
25

## 1 **DISCUSSION**

2           Here, we provide *in vivo* and *in vitro* evidence that ZipA does not inhibit FtsZ  
3   treadmilling dynamics, unlike what was suggested previously (44). Instead, when FtsZ  
4   protofilaments are tethered to lipids by sZipA at levels that probably more closely mimic  
5   physiological conditions, they align and curve to form dynamic swirls that are very similar to  
6   those observed previously by FtsA-mediated tethering to lipids (44), direct adsorption to a  
7   mica surface (67, 68), or when subjected to crowding agents (69). These swirls, whose  
8   dynamics depend on GTP hydrolysis, likely represent treadmilling FtsZ polymers that  
9   comprise the FtsZ ring *in vivo* (8, 9). When we tested sZipA at an artificially high density on  
10   the lipid surface by applying a high (10%) concentration of NTA lipids, FtsZ protofilaments  
11   aligned into large, straight, apparently static structures that are micrometers in length. This  
12   observation is consistent with a previous study using high surface concentrations of sZipA,  
13   which concluded that ZipA curtails FtsZ dynamics (44). Therefore, we propose that lower  
14   surface ZipA densities are necessary to allow FtsZ protofilaments the needed flexibility for  
15   their characteristic dynamic movement along the membrane, which is crucial for guiding  
16   septum synthesis (8, 9).

17           Despite previous reports that ZipA bundles FtsZ when in solution, including  
18   stabilizing highly curved or circular forms of FtsZ polymers (40), here we present several  
19   lines of evidence that ZipA does not directly bundle FtsZ protofilaments at lower, probably  
20   more physiological densities on lipid surfaces or in *E. coli* cells. When attached to a lipid  
21   monolayer at these densities, sZipA efficiently tethers and aligns FtsZ protofilaments, but  
22   close lateral associations were uncommon. Even at high surface densities of sZipA that  
23   promoted extensive and relatively static FtsZ filament alignments, most protofilaments  
24   remain apart, indicating that ZipA does not directly bundle FtsZ like FtsA\* does (13).



1           Furthermore, if ZipA actually stimulates FtsZ protofilament bundling, then it might be  
2 expected to replace the bundling functions of Zap proteins in cells. Instead, and in contrast to  
3 FtsA\*, excess ZipA failed to rescue the cell division deficiency of  $\Delta zapA$  or  $\Delta zapA \Delta zapC$   
4 mutant cells. ZipA also failed to counteract the dominant negative phenotype of the likely  
5 bundling-defective FtsZ<sub>R174D</sub>. In another test of ZipA's bundling ability *in vivo*, it was  
6 predicted that excess ZipA might be more toxic in a bundling-proficient *ftsA\** or *ftsZ\** strain  
7 background compared with a normal background, due to FtsZ over-bundling. Instead, the  
8 *ftsA\** or *ftsZ\** alleles actually antagonized the toxicity of excess ZipA by at least 10-fold,  
9 suggesting again that ZipA is not acting significantly to bundle FtsZ. However, it is also  
10 possible that FtsA\* and FtsZ\* may have already maximally bundled the FtsZ in the cell,  
11 leaving no room for additional bundling by ZipA if it were to occur. The mechanism by  
12 which *ftsA\** or *ftsZ\** suppresses ZipA toxicity cannot yet be ascertained, as it is not yet  
13 known why excess ZipA is toxic.

14           These results suggest that ZipA is not a significant bundling factor for FtsZ, or at least  
15 that its mechanism of action is distinct from that of Zaps, FtsA\* and FtsZ\*. Nevertheless,  
16 extra ZapC could rescue the thermosensitivity of a *zipA1* mutant at 37°C, and even at the  
17 most stringent temperature of 42°C, a combination of ZapA and ZapC was able to rescue  
18 growth somewhat. One explanation for this is that crosslinking of FtsZ polymers by extra  
19 ZapA/ZapC generally promotes FtsZ protofilament alignment in parallel superstructures (i.e.,  
20 swirls) that mimic the swirls assembled by ZipA, thus stabilizing the proto-ring. Because it is  
21 not clear what functions of the mutant ZipA1 protein are compromised at less stringent  
22 nonpermissive temperatures, it is difficult to know what ZapC is rescuing at 37°C that it  
23 cannot rescue at 42°C.

24           This brings up a broader question: why is ZipA essential for divisome function if it  
25 performs what seems to be a very similar function as FtsA? Both promote FtsZ protofilament

1 alignment without permitting bundling *in vitro*, and their *in vivo* phenotypes are consistent  
2 with this, so why are both necessary *in vivo*? For example, when ZipA is inactivated, even in  
3 the presence of FtsA, recruitment of downstream divisome proteins is blocked, implicating  
4 ZipA in that essential function (70). We favor the idea that ZipA has additional roles in later  
5 divisome function that are distinct from those of FtsA. Furthermore, the ability of certain  
6 mutants such as FtsA\* and FtsZ\* to bypass ZipA may not be due solely to restoration of FtsZ  
7 bundling. For example, FtsA\* likely recruits downstream divisome proteins more effectively  
8 than FtsA, and can accelerate cell division (28, 51, 71). It remains to be seen what these  
9 other activities of ZipA are and how they differ from the activities of FtsA. It was previously  
10 suggested that the ability of ZipA to form homodimers via its N-terminal domain might  
11 enhance FtsZ protofilament bundling (72). Although our lipid monolayer assays probably did  
12 not permit homodimerization of sZipA given that the native N terminus is missing, our  
13 genetic data using native ZipA suggest that its homodimerization does not significantly  
14 promote FtsZ bundling *in vivo*.

15 Another important question is how the FtsZ protofilaments become aligned as they  
16 self-assemble on lipids along with their membrane tethers. The study of plant microtubules  
17 may provide clues. During growth of the cortical microtubule array in plant cells,  
18 microtubules align with each other in a self-reinforcing mechanism. When a plus end of a  
19 microtubule meets another microtubule at an angle of less than 40°, the first polymer's plus  
20 end changes direction and ends up parallel with the encountered polymer. When faced with  
21 another microtubule at angles greater than 40°, the plus end is more likely to disassemble  
22 (catastrophe), thus selecting against crossovers and reinforcing parallel alignments (73, 74).  
23 Such behavior, coupled with the tendency of intrinsically curved FtsZ protofilaments to adopt  
24 the intermediate curved conformation (67, 75, 76), could explain how the swirls become  
25 established and self-perpetuate. These curved groups of FtsZ polymers may be important to

1 generate bending forces at the membrane (42, 75). It is possible that highly curved FtsZ also  
2 has a role in this activity, given that FtsZ minirings only ~25 nm in diameter can assemble on  
3 lipid monolayers (40). Although a specific type of membrane tether is not required for the  
4 generation of swirls (45), our data from this study and from our recent report (13) indicate  
5 that both FtsA and ZipA maintain FtsZ protofilaments in an aligned but mostly unbundled  
6 state. Yet the gain-of-function properties of FtsA\* and FtsZ\*, and their ability to specifically  
7 promote FtsZ lateral interactions, suggest that progression of the divisome requires a set of  
8 factors that ultimately switch FtsZ protofilaments to a bundled form. The ability of FtsA\* and  
9 FtsZ\* to bypass ZipA suggests that ZipA itself may be one of these factors, but that it does  
10 not necessarily act directly on FtsZ.

11

## 12 **MATERIALS AND METHODS**

### 13 **Reagents**

14 *E. coli* polar lipid extract (EcL), 1,2-dioleoyl-*sn*-glycero-3-phosphocholine (DOPC), and 1,2-  
15 dioleoyl-*sn*-glycero-3-[(N-(5-amino-1-carboxypentyl)iminodiacetic acid) succinyl] (nickel  
16 salt)(NTA) from Avanti Polar Lipids, Inc. (Alabaster, AL), were kept as 10–20 g/l stocks in  
17 chloroform solutions. Alexa Fluor 488 and Alexa Fluor 647 succinimidyl ester were from  
18 Molecular Probes/Invitrogen. GTP was from Sigma. GMPcPP (Guanosine-5'-[( $\alpha$ , $\beta$ )-  
19 methyleno]triphosphate, Sodium salt) was from Jena Bioscience. All reactants and salts were  
20 of analytical grade (Merck). Chloroform was spectroscopic grade (Merck).

21

### 22 **Strains, plasmids and cell culture**

23 All *E. coli* strains and plasmid used in this study are listed in Table 1. Cells were grown in  
24 Luria-Bertani (LB) medium at 30°C, 37°C or 42°C (as indicated) supplemented with the  
25 appropriate antibiotics (ampicillin 50  $\mu\text{g ml}^{-1}$ , chloramphenicol 15  $\mu\text{g ml}^{-1}$  or tetracycline 10

1  $\mu\text{g ml}^{-1}$ ) and gene expression inducers, IPTG (Isopropyl beta-D-1-thiogalactopyranoside) and  
2 sodium salicylate.

3 Overnight cell cultures were diluted 1:100 in the appropriate media and grown until  
4  $\text{OD}_{600}=0.2$  followed by their back-dilution 1:4. After the second dilution, cells were cultured  
5 to  $\text{OD}_{600}=0.2$  and spotted on plates at 1x, 0.1x, 0.01x, 0.001x, and 0.0001x dilutions from  
6 right to left. For DIC microscopy they were further cultured in the presence of inducers,  
7 maintained in exponential phase, harvested 2h after induction and fixed with 1%  
8 formaldehyde.

9

## 10 **Plasmid constructions and DNA manipulation**

11 Standard protocols for molecular cloning, transformation, and DNA analysis were used in  
12 this study (77). For cloning of *DjlA*<sub>1-32</sub>-*ZipA*<sub>23-328</sub> in salicylate-inducible vector pKG116, we  
13 used the *djlA* forward primer (MK17: 5'-  
14 GGACTAGTATGCAGTATTGGGGAAAATCATTGGC-3') and *zipA* reverse primer  
15 (MK18: 5'-AAGGATCCTCAGGCGTTGGCGTCTTT-3'), using pCH172 plasmid (37)  
16 kindly provided by Piet de Boer, as template. The cloning was confirmed by DNA  
17 sequencing.

18

## 19 **Protein purification and labeling**

20 *E. coli* FtsZ was purified by the  $\text{Ca}^{2+}$ -induced precipitation method (78). The soluble mutant  
21 of ZipA lacking the trans-membrane region (sZipA) was isolated as described (65). FtsZ and  
22 ZipA were labeled with Alexa probes (1:10 molar ratio). FtsZ was labeled under conditions  
23 that promote protein polymerization to ensure minimal interference of the dye with FtsZ  
24 assembly as described (79).

25

## 1 **Lipid monolayer assay**

2 Lipid monolayers were prepared as described previously (13, 61). Briefly, 0.2  $\mu\text{g}$  of *E. coli*  
3 polar lipid extract supplemented with 0.5-10% of NTA lipids when needed, were floated on  
4 Z-buffer (50 mM Tris HCl, pH 7.5, 300 mM KCl, 5 mM  $\text{MgCl}_2$ ) using a custom made teflon  
5 block (80) and placed in a humid chamber for 1h to evaporate the chloroform. Electron  
6 microscopy grids were then placed on the top of each well followed by sequential additions  
7 and incubations of 1  $\mu\text{M}$  sZipA (1 h), 0.5-5  $\mu\text{M}$  FtsZ (15 min) and 2 mM GTP or 0.5 mM  
8 GMPcPP (5 min). The grids were then removed followed by negative staining with uranyl  
9 acetate as described (27) and imaged with a JEOL 1230 electron microscope operated at 100  
10 kV coupled with a TVIPS TemCam-F416 CMOS camera. FtsZ protofilament spacing was  
11 measured using the Plot Profile tool in ImageJ (81).

12

## 13 **Self-organization assays on supported lipid bilayers (SLBs)**

14 Lipid bilayers were formed by fusion of small unilamellar vesicles (SUVs) mediated by  
15  $\text{CaCl}_2$  (82). Lipids (polar extract phospholipids from *E. coli* or DOPC) with or without NTA  
16 at 0.5-1% w/w ratios, were prepared by drying a proper amount of the lipid stock solution  
17 under a nitrogen stream and kept under vacuum for at least 2 h to remove organic solvent  
18 traces. The dried lipid film was dissolved in SLB buffer (50 mM Tris-HCl, pH 7.5, 150 mM  
19 KCl) to a final 4 g/l concentration resulting in a solution containing multilamellar vesicles  
20 (MLVs). After 10 min sonication of MLVs, small unilamellar vesicles (SUVs) were obtained.  
21 One mg/mL suspension of SUVs was added to a hand-operated chamber (a plastic ring  
22 attached on a clean glass coverslip using UV-curable glue (Norland Optical Adhesive 63)).  
23 SLBs were obtained by addition of 2 mM  $\text{CaCl}_2$  and incubated at 37°C for 20 min. Samples  
24 were washed with pre-warmed SLB buffer to remove non-fused vesicles.

1 Confocal images were collected with a Leica TCS SP5 AOBS inverted confocal  
2 microscope with a 63× (N.A. = 1,4–0,6/Oil HCX PL APO, Lbd.Bl.) immersion objective and  
3 Confocal multispectral Leica TCS SP8 system with a 3X STED (Stimulation Emission  
4 Depletion) module for super-resolution (Leica, Mannheim, Germany). TIRFM experiments  
5 were performed on a Leica DMI8 S widefield epifluorescence microscope. Images were  
6 acquired every 0.3 s with Hamamatsu Flash 4 sCMOS digital camera.

7 For self-organization assays, SLB buffer was replaced by Z-buffer prior to protein  
8 addition. The final volume of the assays was 100  $\mu$ l. First, 0.5  $\mu$ M of Alexa Fluor 647-  
9 labeled sZipA was added on top of the lipid bilayer with a given amount of NTA lipids. Once  
10 the fluorescent sZipA was visualized as attached to the lipid bilayer, 1  $\mu$ M FtsZ-Alexa 488  
11 was added followed by addition of 2 mM GTP (or 0.5 mM of GMPcPP) to induce FtsZ  
12 polymerization.

13

#### 14 **Data availability**

15 The authors declare that all data supporting the findings of this study are available within the  
16 article, Supplementary Information, or from the authors upon request.

17

#### 18 **Acknowledgements**

19 We thank Sameer Rajesh and Naga Babu Chinnam for strain constructions and preliminary  
20 experiments, Miguel Vicente and Ana Isabel Rico for the pJF119HE-FtsZ plasmid and Piet  
21 de Boer for the DjlA-ZipA fusion plasmid. We are grateful to members of the Margolin and  
22 Rivas laboratories for helpful discussions, and the Confocal Microscopy service at the Centro  
23 Nacional de Biotecnología, and the Electron Microscopy and the Confocal Microscopy  
24 services at the Centro de Investigaciones Biológicas, both at Consejo Superior de  
25 Investigaciones Científicas, for technical support. This work was supported by grant

- 1 GM61074 from the National Institutes of Health to W.M. and by grant BFU2016-75471-C2-
- 2 1-P from the Spanish Government to G.R.
- 3

## 1 REFERENCES

- 2 1. Krupka M, Margolin W. 2018. Unite to divide: Oligomerization of tubulin and actin  
3 homologs regulates initiation of bacterial cell division. *F1000Research* 7:235.
- 4 2. Rico AI, Krupka M, Vicente M. 2013. In the beginning, *Escherichia coli* assembled the  
5 proto-ring: an initial phase of division. *J Biol Chem* 288:20830–6.
- 6 3. Mukherjee A, Lutkenhaus J. 1994. Guanine nucleotide-dependent assembly of FtsZ into  
7 filaments. *J Bacteriol* 176:2754–2758.
- 8 4. Bramhill D, Thompson CM. 1994. GTP-dependent polymerization of *Escherichia coli*  
9 FtsZ protein to form tubules. *Proc Natl Acad Sci USA* 91:5813–5817.
- 10 5. Erickson HP, Anderson DE, Osawa M. 2010. FtsZ in bacterial cytokinesis: cytoskeleton  
11 and force generator all in one. *Microbiol Mol Biol Rev* 74:504–28.
- 12 6. Coltharp C, Xiao J. 2017. Beyond force generation: Why is a dynamic ring of FtsZ  
13 polymers essential for bacterial cytokinesis? *BioEssays News Rev Mol Cell Dev Biol*  
14 39:1–11.
- 15 7. Sanchez-Gorostiaga A, Palacios P, Martinez-Arteaga R, Sanchez M, Casanova M,  
16 Vicente M. 2016. Life without division: Physiology of *Escherichia coli* FtsZ-deprived  
17 filaments. *mBio* 7:e01620-16.
- 18 8. Bisson-Filho AW, Hsu Y-P, Squyres GR, Kuru E, Wu F, Jukes C, Sun Y, Dekker C,  
19 Holden S, VanNieuwenhze MS, Brun YV, Garner EC. 2017. Treadmilling by FtsZ  
20 filaments drives peptidoglycan synthesis and bacterial cell division. *Science* 355:739–  
21 743.



- 1 9. Yang X, Lyu Z, Miguel A, McQuillen R, Huang KC, Xiao J. 2017. GTPase activity-  
2 coupled treadmilling of the bacterial tubulin FtsZ organizes septal cell wall synthesis.  
3 Science 355:744–747.
- 4 10. Margolin W. 2000. Themes and variations in prokaryotic cell division. FEMS Microbiol  
5 Rev 24:531–548.
- 6 11. Pichoff S, Lutkenhaus J. 2005. Tethering the Z ring to the membrane through a  
7 conserved membrane targeting sequence in FtsA. Mol Microbiol 55:1722–1734.
- 8 12. Pichoff S, Lutkenhaus J. 2002. Unique and overlapping roles for ZipA and FtsA in  
9 septal ring assembly in *Escherichia coli*. EMBO J 21:685–693.
- 10 13. Krupka M, Rowlett VW, Morado DR, Vitrac H, Schoenemann KM, Liu J, Margolin W.  
11 2017. *Escherichia coli* FtsA forms lipid-bound minirings that antagonize lateral  
12 interactions between FtsZ protofilaments. Nat Commun 8:15957.
- 13 14. Koppelman CM, Aarsman ME, Postmus J, Pas E, Muijsers AO, Scheffers DJ, Nanninga  
14 N, den Blaauwen T. 2004. R174 of *Escherichia coli* FtsZ is involved in membrane  
15 interaction and protofilament bundling, and is essential for cell division. Mol Microbiol  
16 51:645–57.
- 17 15. Shin JY, Vollmer W, Lagos R, Monasterio O. 2013. Glutamate 83 and arginine 85 of  
18 helix H3 bend are key residues for FtsZ polymerization, GTPase activity and cellular  
19 viability of *Escherichia coli*: lateral mutations affect FtsZ polymerization and E. coli  
20 viability. BMC Microbiol 13:26.

- 1 16. Marquez IF, Mateos-Gil P, Shin JY, Lagos R, Monasterio O, Velez M. 2017. Mutations  
2 on FtsZ lateral helix H3 that disrupt cell viability hamper reorganization of polymers on  
3 lipid surfaces. *Biochim Biophys Acta* 1859:1815–1827.
- 4 17. Dajkovic A, Pichoff S, Lutkenhaus J, Wirtz D. 2010. Cross-linking FtsZ polymers into  
5 coherent Z rings. *Mol Microbiol* 78:651–68.
- 6 18. Huang KH, Durand-Heredia J, Janakiraman A. 2013. FtsZ ring stability: of bundles,  
7 tubules, crosslinks, and curves. *J Bacteriol* 195:1859–1868.
- 8 19. Gueiros-Filho FJ, Losick R. 2002. A widely conserved bacterial cell division protein  
9 that promotes assembly of the tubulin-like protein FtsZ. *Genes Dev* 16:2544–2556.
- 10 20. Durand-Heredia J, Rivkin E, Fan G, Morales J, Janakiraman A. 2012. Identification of  
11 ZapD as a cell division factor that promotes the assembly of FtsZ in *Escherichia coli*. *J*  
12 *Bacteriol* 194:3189–98.
- 13 21. Durand-Heredia JM, Yu HH, De Carlo S, Lesser CF, Janakiraman A. 2011.  
14 Identification and characterization of ZapC, a stabilizer of the FtsZ ring in *Escherichia*  
15 *coli*. *J Bacteriol* 193:1405–13.
- 16 22. Hale CA, Shiomi D, Liu B, Bernhardt TG, Margolin W, Niki H, de Boer PA. 2011.  
17 Identification of *Escherichia coli* ZapC (YcbW) as a component of the division  
18 apparatus that binds and bundles FtsZ polymers. *J Bacteriol* 193:1393–404.
- 19 23. Galli E, Gerdes K. 2010. Spatial resolution of two bacterial cell division proteins: ZapA  
20 recruits ZapB to the inner face of the Z-ring. *Mol Microbiol* 76:1514–26.
- 21 24. Stricker J, Erickson HP. 2003. In vivo characterization of *Escherichia coli* ftsZ mutants:  
22 effects on Z-ring structure and function. *J Bacteriol* 185:4796–805.

- 1 25. Jaiswal R, Patel RY, Asthana J, Jindal B, Balaji PV, Panda D. 2010. E93R substitution  
2 of *Escherichia coli* FtsZ induces bundling of protofilaments, reduces GTPase activity,  
3 and impairs bacterial cytokinesis. *J Biol Chem* 285:31796–805.
- 4 26. Encinar M, Kralicek AV, Martos A, Krupka M, Cid S, Alonso A, Rico AI, Jimenez M,  
5 Velez M. 2013. Polymorphism of FtsZ filaments on lipid surfaces: role of monomer  
6 orientation. *Langmuir* 29:9436–46.
- 7 27. Haeusser DP, Rowlett VW, Margolin W. 2015. A mutation in *Escherichia coli* ftsZ  
8 bypasses the requirement for the essential division gene zipA and confers resistance to  
9 FtsZ assembly inhibitors by stabilizing protofilament bundling. *Mol Microbiol* 97:988–  
10 1005.
- 11 28. Pichoff S, Shen B, Sullivan B, Lutkenhaus J. 2012. FtsA mutants impaired for self-  
12 interaction bypass ZipA suggesting a model in which FtsA’s self-interaction competes  
13 with its ability to recruit downstream division proteins. *Mol Microbiol* 83:151–67.
- 14 29. Hernandez-Rocamora VM, Reija B, Garcia C, Natale P, Alfonso C, Minton AP, Zorrilla  
15 S, Rivas G, Vicente M. 2012. Dynamic interaction of the *Escherichia coli* cell division  
16 ZipA and FtsZ proteins evidenced in nanodiscs. *J Biol Chem* 287:30097–104.
- 17 30. Hernandez-Rocamora VM, Garcia-Montanes C, Rivas G, Llorca O. 2012.  
18 Reconstitution of the *Escherichia coli* cell division ZipA-FtsZ complexes in nanodiscs  
19 as revealed by electron microscopy. *J Struct Biol* 180:531–8.
- 20 31. Pazos M, Natale P, Vicente M. 2013. A specific role for the ZipA protein in cell  
21 division: stabilization of the FtsZ protein. *J Biol Chem* 288:3219–26.

- 1 32. Ma X, Margolin W. 1999. Genetic and functional analyses of the conserved C-terminal  
2 core domain of *Escherichia coli* FtsZ. *J Bacteriol* 181:7531–7544.
- 3 33. Wang X, Huang J, Mukherjee A, Cao C, Lutkenhaus J. 1997. Analysis of the interaction  
4 of FtsZ with itself, GTP, and FtsA. *J Bacteriol* 179:5551–5559.
- 5 34. Mosyak L, Zhang Y, Glasfeld E, Haney S, Stahl M, Seehra J, Somers WS. 2000. The  
6 bacterial cell-division protein ZipA and its interaction with an FtsZ fragment revealed  
7 by X-ray crystallography. *EMBO J* 19:3179–91.
- 8 35. Szwedziak P, Wang Q, Freund SM, Löwe J. 2012. FtsA forms actin-like protofilaments.  
9 *EMBO J* 31:2249–2260.
- 10 36. Raychaudhuri D. 1999. ZipA is a MAP-Tau homolog and is essential for structural  
11 integrity of the cytokinetic FtsZ ring during bacterial cell division. *EMBO J* 18:2372–  
12 2383.
- 13 37. Hale CA, Rhee AC, de Boer PA. 2000. ZipA-induced bundling of FtsZ polymers  
14 mediated by an interaction between C-terminal domains. *J Bacteriol* 182:5153–5166.
- 15 38. Kuchibhatla A, Bhattacharya A, Panda D. 2011. ZipA binds to FtsZ with high affinity  
16 and enhances the stability of FtsZ protofilaments. *PLoS One* 6:e28262.
- 17 39. Mateos-Gil P, Marquez I, Lopez-Navajas P, Jimenez M, Vicente M, Mingorance J,  
18 Rivas G, Velez M. 2012. FtsZ polymers bound to lipid bilayers through ZipA form  
19 dynamic two dimensional networks. *Biochim Biophys Acta* 1818:806–13.
- 20 40. Chen Y, Huang H, Osawa M, Erickson HP. 2017. ZipA and FtsA\* stabilize FtsZ-GDP  
21 miniring structures. *Sci Rep* 7:3650.

- 1 41. Osawa M, Anderson DE, Erickson HP. 2008. Reconstitution of contractile FtsZ rings in  
2 liposomes. *Science* 320:792–4.
- 3 42. Osawa M, Erickson HP. 2013. Liposome division by a simple bacterial division  
4 machinery. *Proc Natl Acad Sci USA* 110:11000–11004.
- 5 43. Szwedziak P, Wang Q, Bharat TAM, Tsim M, Löwe J. 2014. Architecture of the ring  
6 formed by the tubulin homologue FtsZ in bacterial cell division. *eLife* 3:e04601.
- 7 44. Loose M, Mitchison TJ. 2014. The bacterial cell division proteins FtsA and FtsZ self-  
8 organize into dynamic cytoskeletal patterns. *Nat Cell Biol* 16:38–46.
- 9 45. Ramirez D, Garcia-Soriano DA, Raso A, Feingold M, Rivas G, Schwille P. 2017. Chiral  
10 vortex dynamics on membranes is an intrinsic property of FtsZ, driven by GTP  
11 hydrolysis. *BioRxiv* 79533.
- 12 46. Sobrinos-Sanguino M, Zorrilla S, Monterroso B, Minton AP, Rivas G. 2017. Nucleotide  
13 and receptor density modulate binding of bacterial division FtsZ protein to ZipA  
14 containing lipid-coated microbeads. *Sci Rep* 7:13707.
- 15 47. Conti J, Viola MG, Camberg JL. 2018. FtsA reshapes membrane architecture and  
16 remodels the Z-ring in *Escherichia coli*. *Mol Microbiol* 107:558–576.
- 17 48. Geissler B, Elraheb D, Margolin W. 2003. A gain of function mutation in *ftsA* bypasses  
18 the requirement for the essential cell division gene *zipA* in *Escherichia coli*. *Proc Natl*  
19 *Acad Sci USA* 100:4197–4202.
- 20 49. Cabré EJ, Sanchez-Gorostiaga A, Carrara P, Roperio N, Casanova M, Palacios P, Stano  
21 P, Jimenez M, Rivas G, Vicente M. 2013. Bacterial division proteins FtsZ and ZipA  
22 induce vesicle shrinkage and cell membrane invagination. *J Biol Chem* 288:26625–34.

- 1 50. Geissler B, Margolin W. 2005. Evidence for functional overlap among multiple  
2 bacterial cell division proteins: compensating for the loss of FtsK. *Mol Microbiol*  
3 58:596–612.
- 4 51. Geissler B, Shiomi D, Margolin W. 2007. The *ftsA\** gain-of-function allele of  
5 *Escherichia coli* and its effects on the stability and dynamics of the Z ring.  
6 *Microbiology* 153:814–825.
- 7 52. Ortiz C, Casanova M, Palacios P, Vicente M. 2017. The hypermorph FtsA\* protein has  
8 an in vivo role in relieving the *Escherichia coli* proto-ring block caused by excess ZapC.  
9 *PloS One* 12:e0184184.
- 10 53. Samaluru H, SaiSree L, Reddy M. 2007. Role of SufI (FtsP) in cell division of  
11 *Escherichia coli*: evidence for its involvement in stabilizing the assembly of the  
12 divisome. *J Bacteriol* 189:8044–8052.
- 13 54. Haeusser DP, Margolin W. 2016. Splitsville: structural and functional insights into the  
14 dynamic bacterial Z ring. *Nat Rev Microbiol* 14:305–319.
- 15 55. Bernhardt TG, de Boer PA. 2003. The *Escherichia coli* amidase AmiC is a periplasmic  
16 septal ring component exported via the twin-arginine transport pathway. *Mol Microbiol*  
17 48:1171–1182.
- 18 56. Moy FJ, Glasfeld E, Mosyak L, Powers R. 2000. Solution structure of ZipA, a crucial  
19 component of *Escherichia coli* cell division. *Biochemistry (Mosc)* 39:9146–56.
- 20 57. Du S, Park K-T, Lutkenhaus J. 2014. Oligomerization of FtsZ converts the FtsZ tail  
21 motif (CCTP) into a multivalent ligand with high avidity for partners ZipA and SlmA.  
22 *Mol Microbiol.* 95:173-188.

- 1 58. Moore DA, Whatley ZN, Joshi CP, Osawa M, Erickson HP. 2017. Probing for binding  
2 regions of the FtsZ protein surface through site-directed insertions: Discovery of fully  
3 functional FtsZ-fluorescent proteins. *J Bacteriol* 199:e00553-16.
- 4 59. Vega DE, Margolin W. 2018. Suppression of a thermosensitive zipA cell division  
5 mutant by altering amino acid metabolism. *J Bacteriol* 200:e00535-17.
- 6 60. Buss J, Coltharp C, Shtengel G, Yang X, Hess H, Xiao J. 2015. A multi-layered protein  
7 network stabilizes the *Escherichia coli* FtsZ-ring and modulates constriction dynamics.  
8 *PLoS Genet* 11:e1005128.
- 9 61. Krupka M, Cabre EJ, Jimenez M, Rivas G, Rico AI, Vicente M. 2014. Role of the FtsA  
10 C terminus as a switch for polymerization and membrane association. *mBio* 5:e02221.
- 11 62. Erickson HP, Taylor DW, Taylor KA, Bramhill D. 1996. Bacterial cell division protein  
12 FtsZ assembles into protofilament sheets and minirings, structural homologs of tubulin  
13 polymers. *Proc Natl Acad Sci USA* 93:519–523.
- 14 63. Lowe J, van den Ent F. 2001. Conserved sequence motif at the C-terminus of the  
15 bacterial cell- division protein FtsA. *Biochimie* 83:117–20.
- 16 64. Hale CA, de Boer PA. 1997. Direct binding of FtsZ to ZipA, an essential component of  
17 the septal ring structure that mediates cell division in *E. coli*. *Cell* 88:175–185.
- 18 65. Martos A, Alfonso C, Lopez-Navajas P, Ahijado-Guzmn R, Mingorance J, Minton AP,  
19 Rivas G. 2010. Characterization of self-association and heteroassociation of bacterial  
20 cell division proteins FtsZ and ZipA in solution by composition gradient-static light  
21 scattering. *Biochemistry (Mosc)* 49:10780–10787.

- 1 66. Rueda S, Vicente M, Mingorance J. 2003. Concentration and assembly of the division  
2 ring proteins FtsZ, FtsA, and ZipA during the *Escherichia coli* cell cycle. *J Bacteriol*  
3 185:3344–3351.
- 4 67. Mingorance J, Tadros M, Vicente M, Gonzalez JM, Rivas G, Velez M. 2005.  
5 Visualization of single *Escherichia coli* FtsZ filament dynamics with atomic force  
6 microscopy. *J Biol Chem* 280:20909–20914.
- 7 68. Mateos-Gil P, Paez A, Horger I, Rivas G, Vicente M, Tarazona P, Velez M. 2012.  
8 Depolymerization dynamics of individual filaments of bacterial cytoskeletal protein  
9 FtsZ. *Proc Natl Acad Sci USA* 109:8133–8.
- 10 69. Popp D, Iwasa M, Narita A, Erickson HP, Maeda Y. 2009. FtsZ condensates: an in vitro  
11 electron microscopy study. *Biopolymers* 91:340–350.
- 12 70. Hale CA, de Boer PA. 2002. ZipA is required for recruitment of FtsK, FtsQ, FtsL, and  
13 FtsN to the septal ring in *Escherichia coli*. *J Bacteriol* 184:2552–2556.
- 14 71. Liu B, Persons L, Lee L, DeBoer P. 2015. Roles for both FtsA and the FtsBLQ  
15 subcomplex in FtsN-stimulated cell constriction in *Escherichia coli*. *Mol Microbiol*  
16 95:945–970.
- 17 72. Skoog K, Daley DO. 2012. The *Escherichia coli* cell division protein ZipA forms  
18 homodimers prior to association with FtsZ. *Biochemistry (Mosc)* 51:1407–15.
- 19 73. Shaw SL, Kamyar R, Ehrhardt DW. 2003. Sustained microtubule treadmilling in  
20 *Arabidopsis* cortical arrays. *Science* 300:1715–1718.
- 21 74. Dixit R, Cyr R. 2004. The cortical microtubule array: from dynamics to organization.  
22 *Plant Cell* 16:2546–2552.



- 1 75. Erickson HP, Osawa M. 2017. FtsZ constriction force - curved protofilaments bending  
2 membranes. *Subcell Biochem* 84:139–160.
- 3 76. Li Y, Hsin J, Zhao L, Cheng Y, Shang W, Huang KC, Wang HW, Ye S. 2013. FtsZ  
4 protofilaments use a hinge-opening mechanism for constrictive force generation.  
5 *Science* 341:392–395.
- 6 77. Sambrook J, Fritsch EF, Maniatis T. 1989. *Molecular Cloning: a Laboratory Manual*,  
7 2nd ed. Cold Spring Harbor Laboratory Press, Cold Spring Harbor, New York.
- 8 78. Rivas G, Lopez A, Mingorance J, Ferrandiz MJ, Zorrilla S, Minton AP, Vicente M,  
9 Andreu JM. 2000. Magnesium-induced linear self-association of the FtsZ bacterial cell  
10 division protein monomer. The primary steps for FtsZ assembly. *J Biol Chem*  
11 275:11740–9.
- 12 79. Gonzalez JM, Jimenez M, Velez M, Mingorance J, Andreu JM, Vicente M, Rivas G.  
13 2003. Essential cell division protein FtsZ assembles into one monomer-thick ribbons  
14 under conditions resembling the crowded intracellular environment. *J Biol Chem*  
15 278:37664–37671.
- 16 80. Sanchez-Gorostiaga, A., Rico AI, P. Natale, Krupka M, Vicente M. 2015. *Marrying*  
17 *single molecules to single cells: Protocols for the study of the bacterial proto-ring*  
18 *components essential for division. Hydrocarbon and Lipid Microbiology Protocols.*  
19 Springer-Verlag, Heidelberg.
- 20 81. Schneider CA, Rasband WS, Eliceiri KW. 2012. NIH Image to ImageJ: 25 years of  
21 image analysis. *Nat Methods* 9:671–675.

- 1 82. Martos A, Raso A, Jimenez M, Petrasek Z, Rivas G, Schwille P. 2015. FtsZ polymers  
2 tethered to the membrane by ZipA are susceptible to spatial regulation by Min waves.  
3 *Biophys J* 108:2371–2383.
- 4 83. Miroux B, Walker JE. 1996. Over-production of proteins in *Escherichia coli*: mutant  
5 hosts that allow synthesis of some membrane proteins and globular proteins at high  
6 levels. *J Mol Biol* 260:289–98.
- 7 84. Mowery P, Ames P, Reiser RH, Parkinson JS. 2015. Chemotactic signaling by single-  
8 chain chemoreceptors. *PloS One* 10:e0145267.
- 9 85. Han X-S, Parkinson JS. 2014. An unorthodox sensory adaptation site in the *Escherichia*  
10 *coli* serine chemoreceptor. *J Bacteriol* 196:641–649.
- 11 86. Shiomi D, Margolin W. 2007. Dimerization or oligomerization of the actin-like FtsA  
12 protein enhances the integrity of the cytokinetic Z ring. *Mol Microbiol* 66:1396–1415.
- 13

1 **Figure legends**

2 **Figure 1. FtsA\* or excess FtsZ can rescue the FtsZ bundling deficient  $\Delta zapA\Delta zapC$**

3 **mutant.** (A) Cells of the TB28 parent, or (B-D)  $\Delta zapA\Delta zapC$  double mutant carrying either  
4 no plasmid (B), pJF119HE-FtsZ (C) or pDSW210F-FtsA\* (D) were grown to mid-  
5 logarithmic phase in LB medium (supplemented with 50  $\mu$ M IPTG in C) and imaged using  
6 DIC. Scale bar= 10  $\mu$ m.

7

8 **Figure 2. Excess ZipA or a ZipA with a swapped transmembrane domain cannot**

9 **compensate for cell division deficiencies of  $\Delta zap$  mutants.** (A) TB28 and Zap-deletion  
10 strains  $\Delta zapA$  and  $\Delta zapA\Delta zapC$  transformed with pKG110 empty vector (EV) or pKG110-  
11 ZipA (pZipA) were grown to exponential phase and plate spotted IN 10-fold dilutions at  
12 different concentrations of inducer (sodium salicylate; Na-Sal). (B-E) Representative DIC  
13 images of  $\Delta zapA\Delta zapC$  cells transformed with pKG110-ZipA (B-D) and pKG116-DjlA<sub>1-32</sub>-  
14 ZipA<sub>23-328</sub> (E) are shown (see panel descriptions and text). Scale bar= 10  $\mu$ m.

15

16 **Figure 3. The *ftsZ\** or *ftsA\** alleles counteract the toxicity of excess ZipA.** WM1074

17 wild-type strain and its derivatives containing chromosomal *ftsA\** (WM1659) and *ftsZ\**  
18 (WM4915), transformed with pKG110-ZipA were grown to exponential phase and spotted on  
19 plates at 10-fold dilutions with different concentrations of inducer (sodium salicylate; Na-  
20 Sal).

21

22 **Figure 4. Excess Zap proteins only weakly suppress the *zipAI* thermosensitive allele.**

23 The WM5337 *zipAI* thermosensitive strain was transformed with the pairs of compatible  
24 plasmids indicated at each row, and spotted on pre-warmed plates at 10-fold dilutions

1 containing indicated concentrations of inducers (IPTG for pDSW plasmids and Na-Sal for  
2 pKG116) and incubated at 30, 37 and 42°C.

3

4 **Figure 5. Assembly of FtsZ on *E. coli* polar lipid monolayers containing sZipA**

5 **visualized by negative stain transmission electron microscopy.** (A) Examples of circular

6 structures of FtsZ single filaments on a lipid monolayer containing 0.5% DGS-NTA and

7 sZipA (1  $\mu$ M) in the presence of GMPcPP. FtsZ concentration was 1.5  $\mu$ M. Scale bar = 200

8 nm. (B) Examples of circular structures of FtsZ single filaments on a sZipA-containing

9 monolayer with 1% of DGS-NTA in the presence of GTP. FtsZ concentration was 2.5  $\mu$ M.

10 Scale bar = 200 nm. (C) Straight FtsZ filaments assembled in the presence of GTP on a lipid

11 monolayer with a high surface density of sZipA (attached to 10% of DGS-NTA). The

12 arrowhead highlights a typical single protofilament; the full arrow highlights a less common

13 double protofilament. FtsZ and sZipA concentrations were 5 and 2  $\mu$ M, respectively. Grids

14 for all three panels were negatively stained and visualized by electron microscopy. Scale bar

15 = 100 nm.

16

17 **Figure 6. Fluorescence microscopic images of FtsZ assembly on SLBs of *E. coli* polar**

18 **lipids containing sZipA.** (A) Assembly of Alexa 488-labeled FtsZ into dynamic vortices

19 after GTP addition. (B) Assembly of similar circular structures after GMPcPP addition. (C)

20 Representative high resolution STED image of the experiment shown in panel B. FtsZ and

21 sZipA concentrations were 1  $\mu$ M. Scale bars = 1  $\mu$ m.

22

23

24

25

1 **Supplemental Figure legends:**

2

3 **Figure S1. Immunoblots showing cellular levels of FtsZ and ZipA in various induction**

4 **conditions and genotypes.** SDS-PAGE of cell extracts from (A) TB28 (WT),  $\Delta zapA$  ( $\Delta A$ )

5 and  $\Delta zapA\Delta zapC$  ( $\Delta AC$ ) backgrounds and (B) WM1074 (WT) and its derivatives containing

6 chromosomal *ftsA*\* and *ftsZ*\* were blotted and probed with anti-FtsZ or anti-ZipA polyclonal

7 antibodies (48). Relative band intensities for each of the 4 blots were analyzed and plotted in

8 ImageJ, with the weakest band in each set normalized to 1.

9

10 **Figure S2. Excess ZipA cannot counteract the dominant negative effects of an under-**

11 **bundled FtsZ.** WM1074 wild-type cells co-transformed with pKG110-FtsZ (p-FtsZ) or

12 toxic, dominant negative FtsZ<sub>R174D</sub> (p-FtsZ<sub>R174D</sub>) and pDSW210 (pEV) or pDSW210-ZipA-

13 GFP (pZipA) were spotted on plates containing indicated concentrations of inducers to test if

14 the toxicity of FtsZ<sub>R174D</sub> could be antagonized by ZipA.

15

16 **Figure S3. sZipA does not form structures on lipid monolayers and FtsZ only forms**

17 **residual sporadic filaments on monolayers supplemented with DGS-NTA.** sZipA (2  $\mu$ M)

18 was incubated on lipid monolayers containing 10% NTA lipids (A). 5  $\mu$ M FtsZ was

19 incubated on monolayers with 1% of NTA lipids, but not seeded with sZipA (B). Grids were

20 negatively stained and visualized by electron microscopy. Arrow highlights a single FtsZ

21 protofilament. Scale bar= 100 nm.

22

23 **Figure S4. Assembly of FtsZ on lipid monolayers containing sZipA and the effect of**

24 **FtsZ concentration and of lipid composition.** (A) Circular structures of FtsZ single

25 filaments on a DOPC monolayer containing 1% of DGS-NTA and 2  $\mu$ M sZipA in the

1 presence of GMPcPP. FtsZ concentration was 5  $\mu$ M. (B) The equivalent experiment was  
2 performed on an *E. coli* polar lipid monolayer. Scale bars are shown.

3

4 **Figure S5. Kymographs of FtsZ swirls on SLBs carrying low-density sZipA.**

5 Representative kymographs tracking the circumferential motion of individual FtsZ Alexa 488  
6 swirls (as seen on videos) (A) with added GTP or (B) with added GMPcPP. Time and length  
7 scales are indicated, and black lines denote two representative paths of traveling fluorescence  
8 intensities. The slopes of the lines correspond to the velocity ( $x/t$ ). Kymographs were  
9 obtained using an ImageJ kymograph plugin (Jens Rietdorf and Arne Seitz, EMBL,  
10 Heidelberg); 20 different circular structures were analyzed.

11

12 **Video S1: GTP-dependent assembly of FtsZ on supported *E. coli* lipid bilayers**

13 **containing low-density sZipA.** Video of FtsZ ring-like filaments formation after GTP  
14 addition. FtsZ Alexa Fluor 488 and sZipA concentrations are the same as in Figure 6A.

15

16 **Video S2: GMPcPP-dependent assembly of FtsZ on supported *E. coli* lipid bilayers**

17 **containing low-density sZipA.** Video of FtsZ ring-like filaments formation after GMPcPP  
18 addition. FtsZ Alexa Fluor 488 and sZipA concentrations are the same as in Figure 6B.

19

20

21

1 **Table 1. Strains and plasmids used in this study.**

2

| Strain        | Description                                         | Source/reference |
|---------------|-----------------------------------------------------|------------------|
| BL21/DE3      | Host for protein overproduction                     | (83)             |
| C43           | Host for protein overproduction                     | (83)             |
| TB28          | MG1655 $\Delta lacIZYA::frr$                        | (55)             |
| TOP10         | Cloning strain                                      | Invitrogen       |
| WM1074        | MG1655 $\Delta lacU169$                             | Lab collection   |
| WM1659        | WM1074 <i>ftsA*</i> <i>leuO::Tn10</i>               | (48)             |
| WM4842        | TB28 $\Delta zapA::frr$                             | (20)             |
| WM4843        | TB28 $\Delta zapA::frr \Delta zapC::kan$            | (20)             |
| WM4915        | WM1074 <i>ftsZ*</i> <i>leuO::Tn10</i>               | (27)             |
|               |                                                     |                  |
| Plasmid       | Description                                         | Source/reference |
|               |                                                     |                  |
| pKG110        | pACYC184 derivative with <i>nahG</i> promoter       | (84)             |
| pKG116        | pKG110 with stronger ribosome binding site          | (85)             |
| pDH156        | pKG110-FtsZ                                         | (27)             |
| pDH159        | pKG116-FtsZ*                                        | (27)             |
| pWM1851       | pDSW207-ZapA                                        | Lab collection   |
| pWM2784       | pDSW210-FLAG                                        | (86)             |
| pWM2787       | pWM2784-FtsA*                                       | (86)             |
| pWM2978       | pDSW208-ZapC                                        | (22)             |
| pWM3073       | pKG110-ZipA                                         | (86)             |
| pWM3074       | pKG116-ZapA                                         | (86)             |
| pWM4651       | pKG110-ZapA                                         | (13)             |
| pWM5265       | pDSW210-ZipA-GFP                                    | (59)             |
| pWM5310       | pKG116-ZapC                                         | This study       |
| pWM5366       | pKG110-FtsZ <sub>R174D</sub>                        | Kara Schoenemann |
| pWM5674       | pKG116-ZapD                                         | This study       |
| pWM5883       | pKG116-DjlA <sub>1-32</sub> -ZipA <sub>23-328</sub> | Sameer Rajesh    |
| pMFV56        | pET28a-FtsZ                                         | (78)             |
| pCH172        | DjlA-ZipA fusion                                    | (37)             |
| pJF119HE-FtsZ | IPTG-inducible <i>ftsZ</i> on plasmid               | (26)             |
| pET15-sZip    | IPTG-inducible <i>szipA</i> on plasmid              | (65)             |

3

4

5

6

7

8

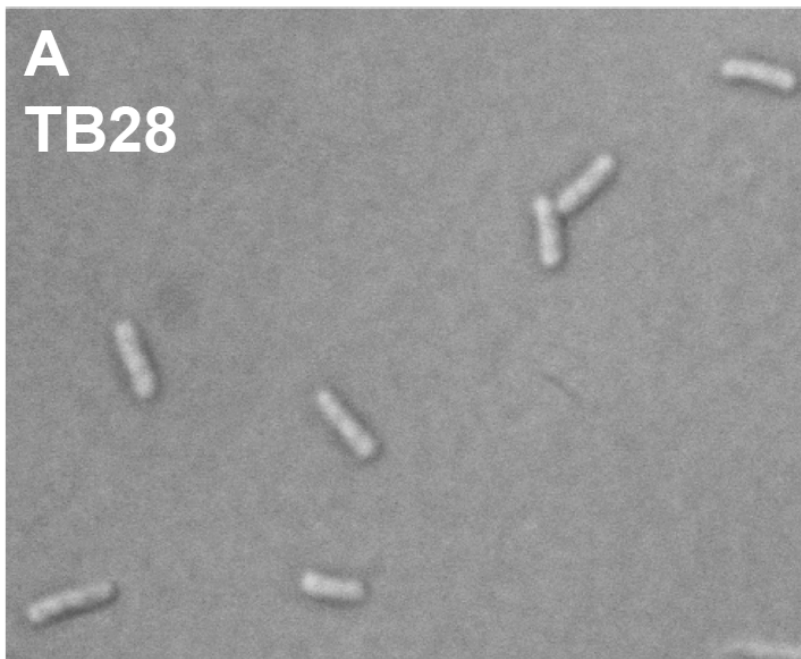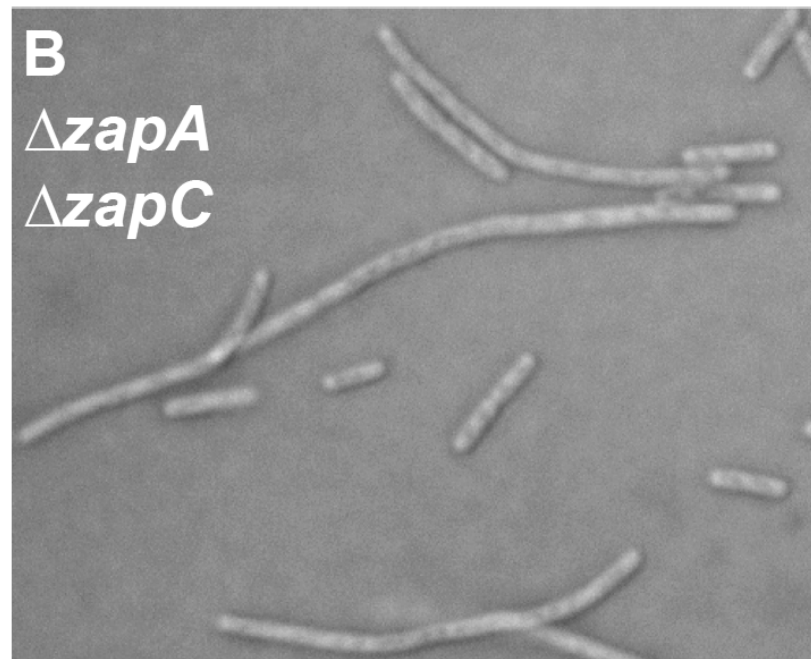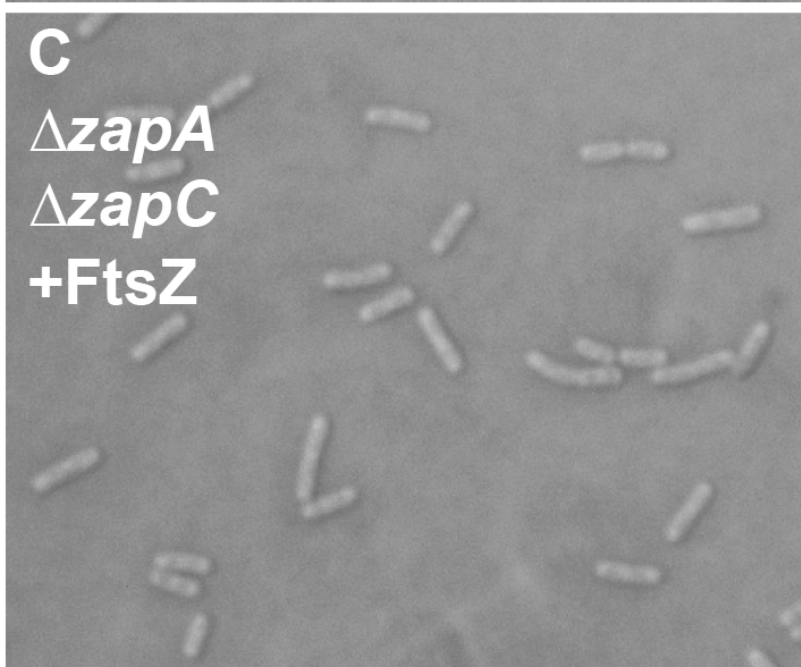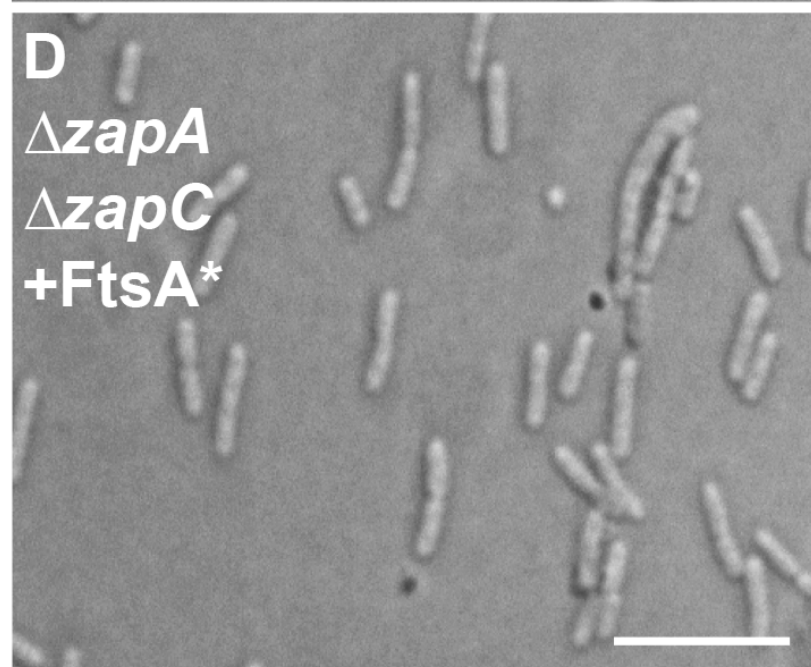



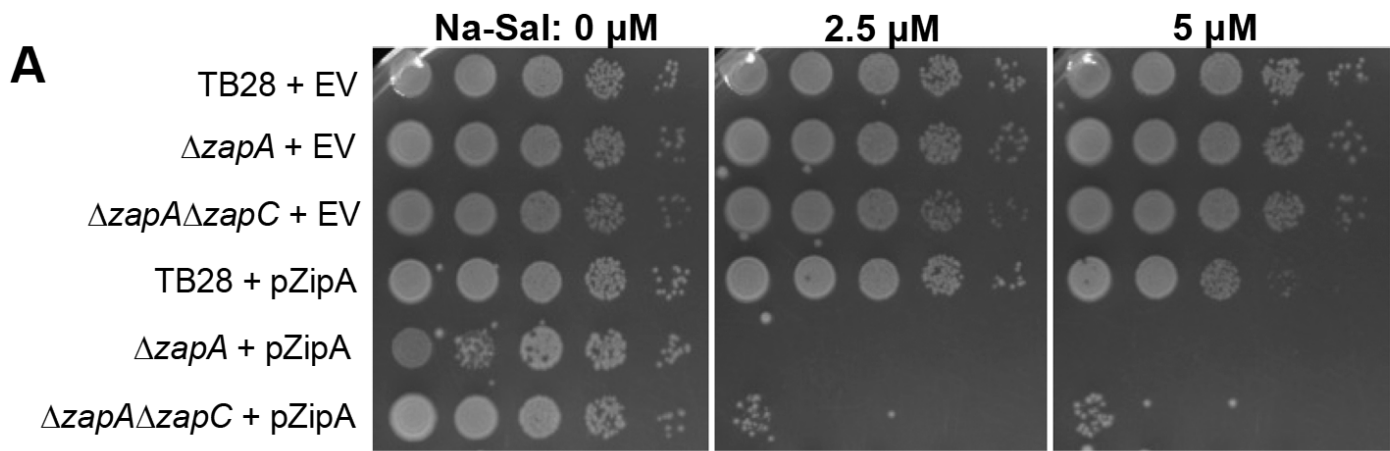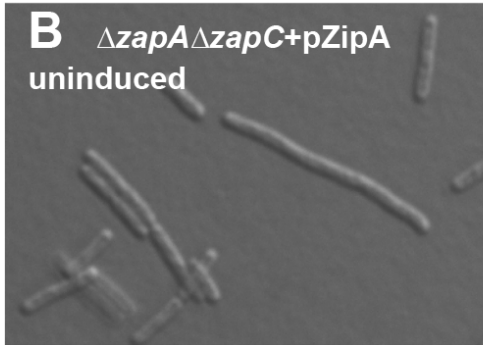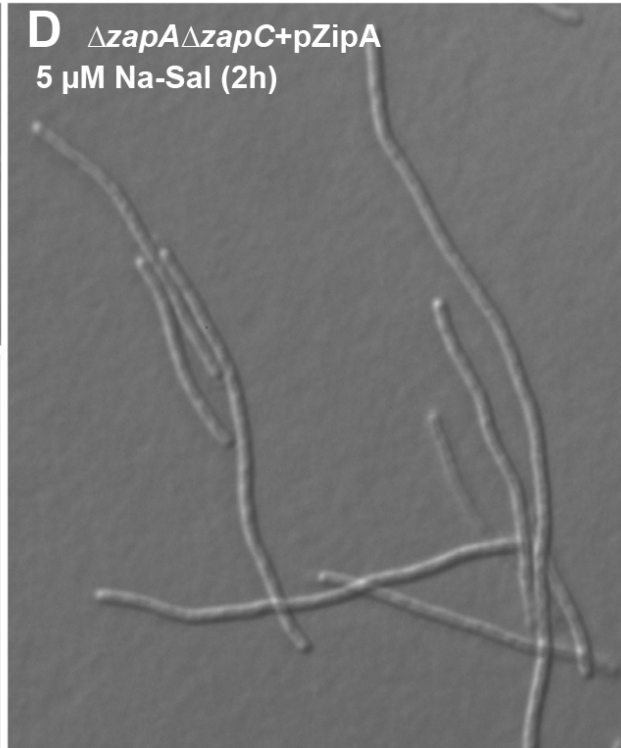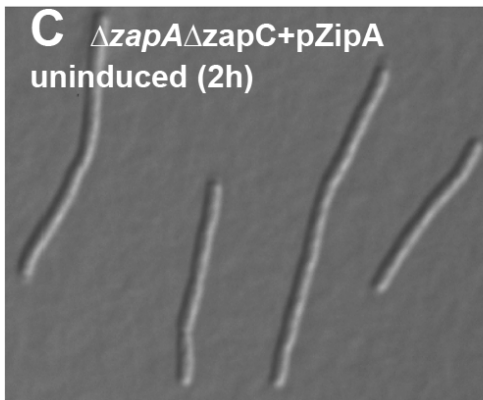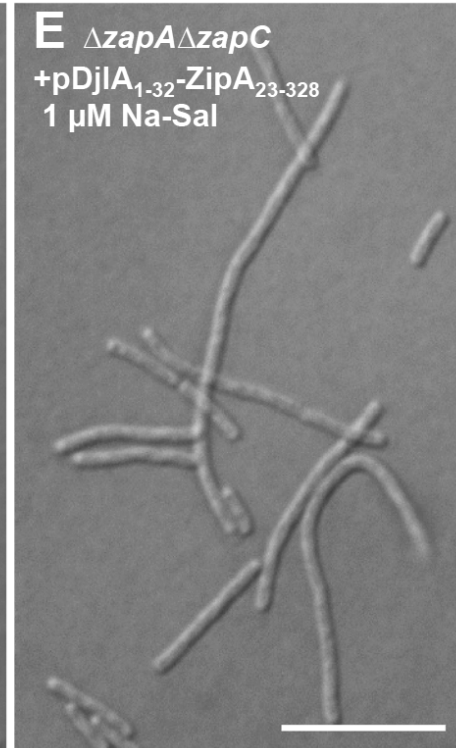

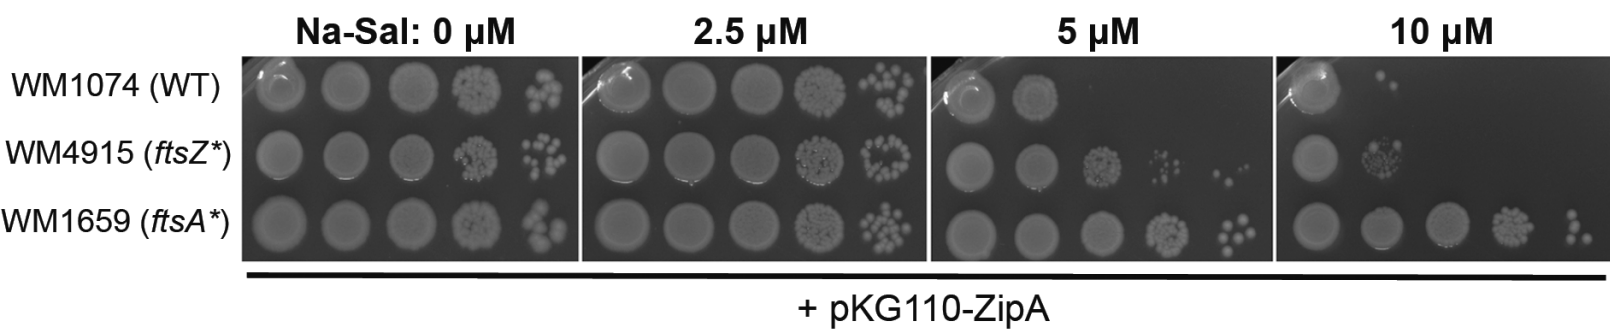

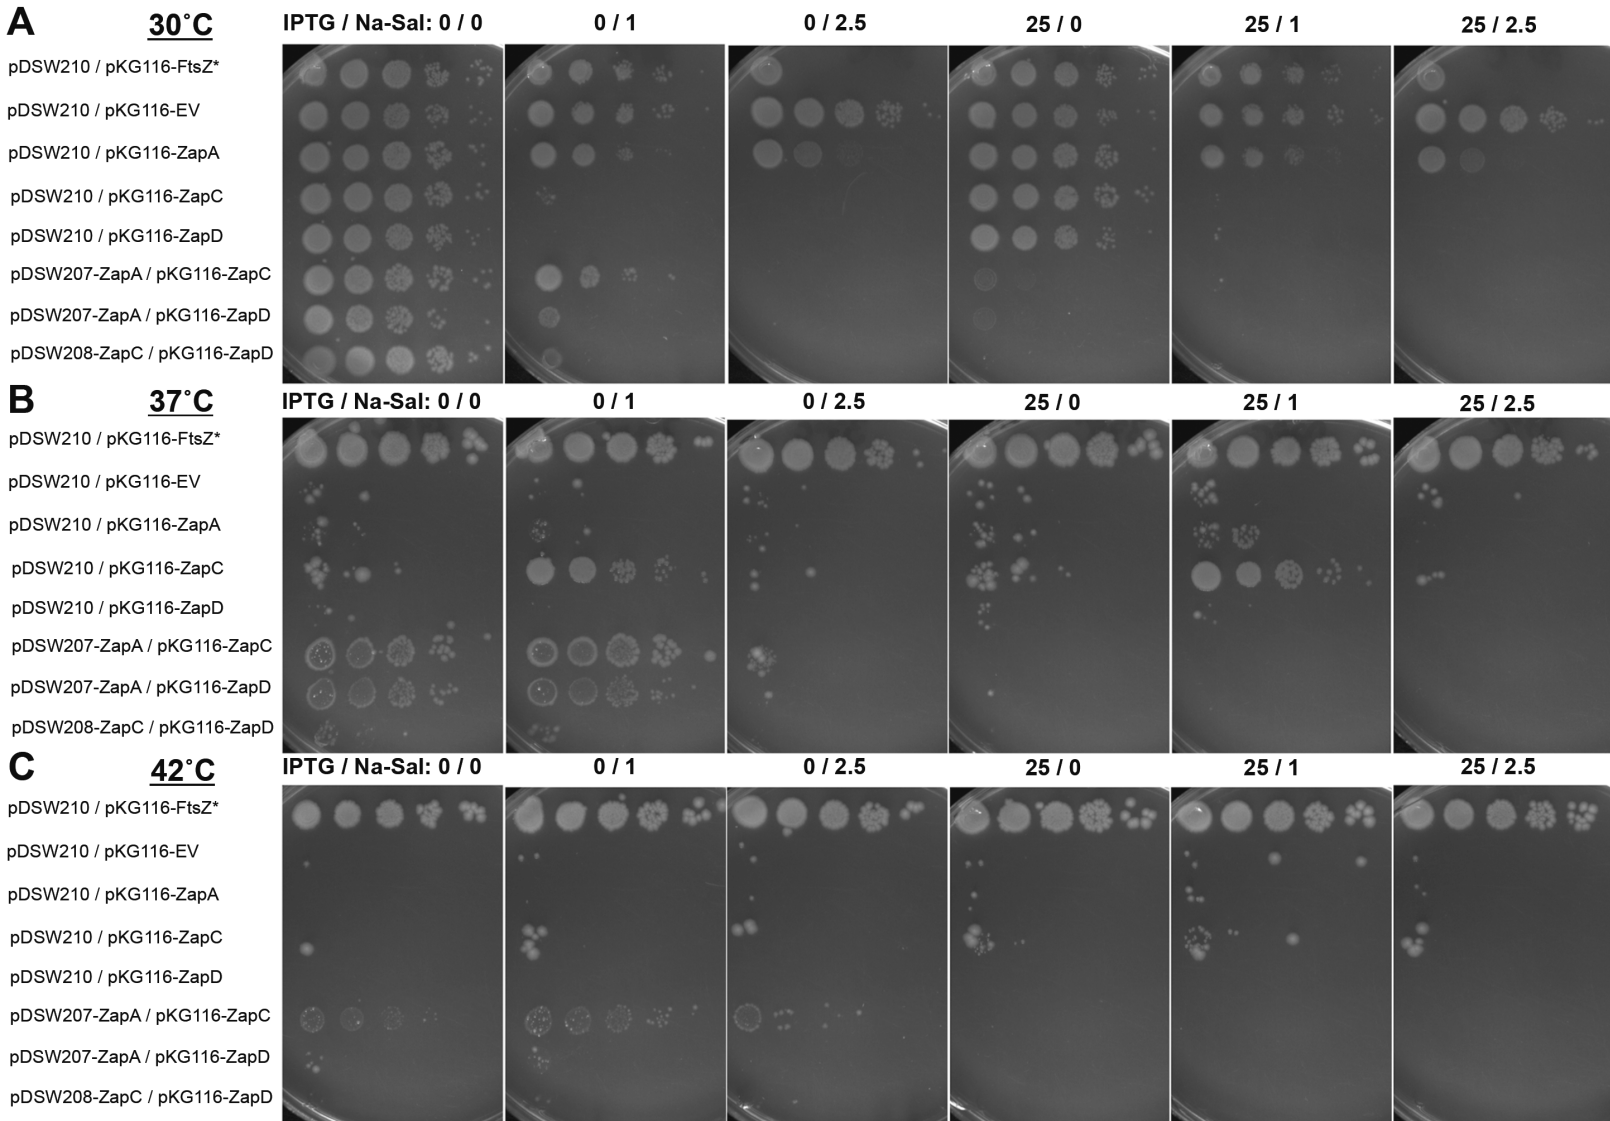

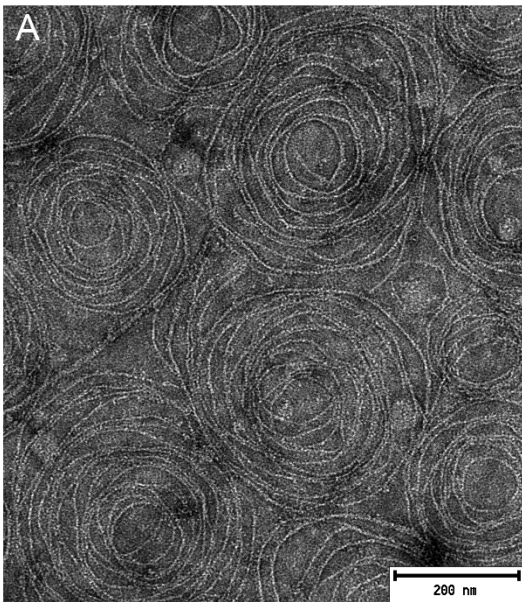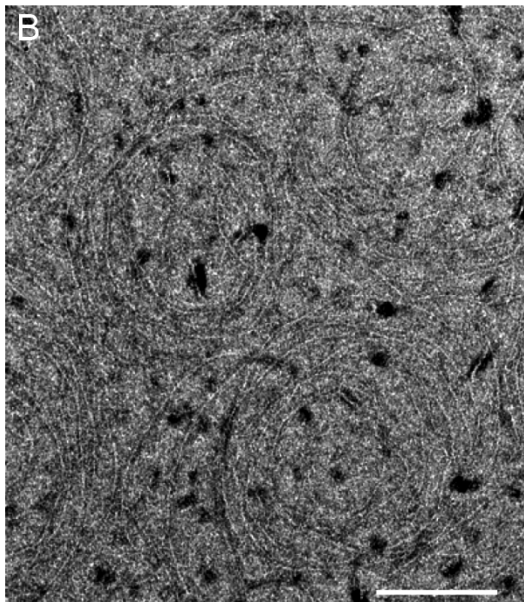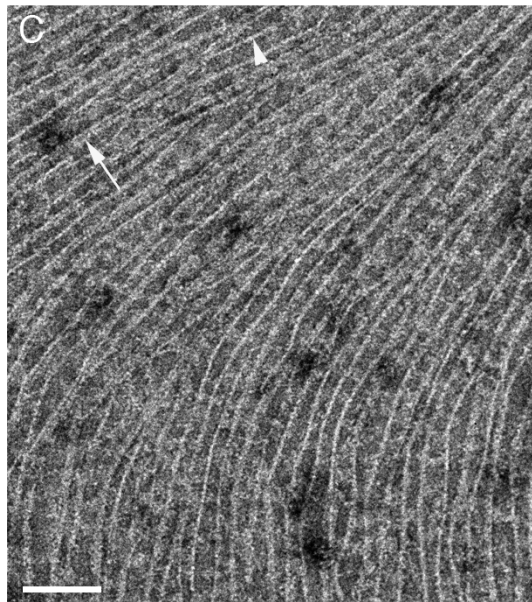

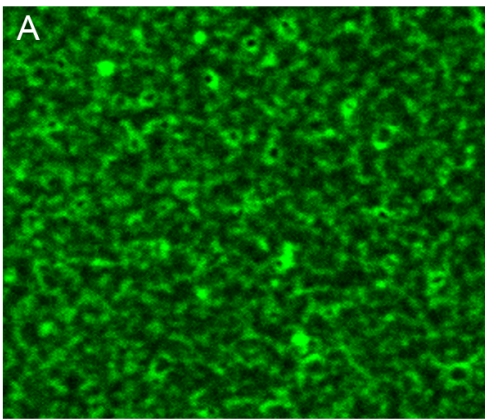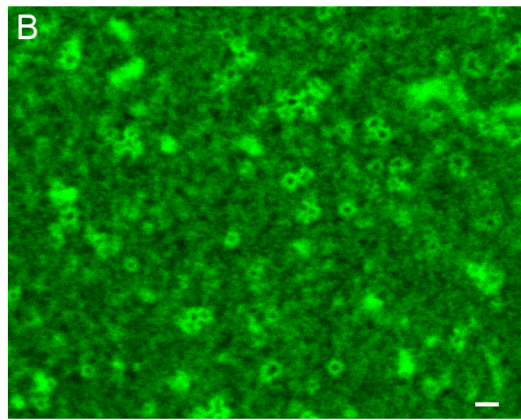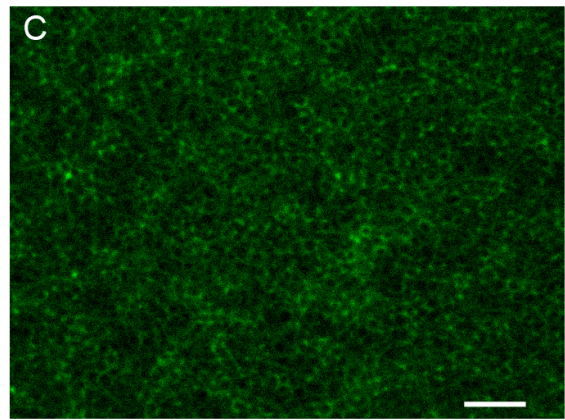

Source: https://www.biorxiv.org/content/10.1101/319228v2.full.pdf
